# Supplementary material for: Yellowing, Weathering and Degradation of Marine Pellets and Their Influence on the Adsorption of Chemical Pollutants
Source: MDPI journal article supplement (doi:10.3390/polym14071305), 2022-03-24
Supplement: s1 [file s1]

**Table S1.** Compounds list analyzed by GC-MS, classified as PCBs (group A), OCP (group B) or PAH (group C). Retention time (min) and SIM conditions for each compound.

| SIM<br>Groups           | Analyzed Compounds |        |                  |                             | Retention<br>Time (min) | Quantita-<br>tion Ion | Qualifer<br>Ion |     | Dwell<br>Time<br>(ms) |
|-------------------------|--------------------|--------|------------------|-----------------------------|-------------------------|-----------------------|-----------------|-----|-----------------------|
|                         | Nº                 | Groups | Symbol<br>groups | Compound Name               |                         |                       |                 |     |                       |
| 1 (10.00-<br>12.35min)  | 1                  | OCPs   | B                | AlphaBCH                    | 11,465                  | 219                   | 181             |     | 50                    |
|                         | 2                  | OCPs   | B                | Atrazine                    | 11,911                  | 215                   | 217             | 220 | 50                    |
|                         | 3                  | OCPs   | B                | BetaBCH                     | 12,067                  | 219                   | 183             |     | 50                    |
|                         | 4                  | OCPs   | B                | GammaBCH                    | 12,242                  | 219                   | 181             |     | 50                    |
| 2 (12.35-<br>13.20min)  | 5                  | PAHs   | C                | Anthracene                  | 12,63                   | 178                   | 176             | 179 | 60                    |
|                         | 6                  | OCPs   | B                | DeltaBCH                    | 12,815                  | 219                   | 181             |     | 60                    |
| 3 (13.20-<br>14.36min)  | 7                  | PCB    | A                | PCB28                       | 13,68                   | 258                   | 186             |     | 75                    |
|                         | 8                  | OCPs   | B                | Heptachlor                  | 14,128                  | 272                   | 100             |     | 75                    |
| 4 (14.36-<br>16.87min)  | 9                  | PCBs   | A                | PCB52                       | 14,635                  | 292                   | 220             |     | 75                    |
|                         | 10                 | OCPs   | B                | Aldrin                      | 15,113                  | 263                   | 293             |     | 75                    |
| 5 (16.87-<br>17.84min)  | 11                 | PCBs   | A                | PCB101                      | 17,28                   | 326                   | 256             |     | 75                    |
|                         | 12                 | OCPs   | B                | Endosulfan I                | 17,431                  | 241                   | 195             |     | 75                    |
| 6 (17.84-<br>18.62min)  | 13                 | OCPs   | B                | 4,4-DDE                     | 18,197                  | 246                   | 318             |     | 75                    |
|                         | 14                 | OCPs   | B                | Dieldrin                    | 18,254                  | 263                   | 79              |     | 75                    |
| 7 (18.62-<br>20.31min)  | 15                 | OCPs   | B                | Endrin                      | 18,956                  | 263                   | 81              |     | 30                    |
|                         | 16                 | PCBs   | A                | PCB118                      | 19,289                  | 326                   | 254             |     | 30                    |
|                         | 17                 | OCPs   | B                | 4,4-DDD                     | 19,564                  | 235                   | 165             |     | 30                    |
|                         | 18                 | OCPs   | B                | Endrin Aldehyde             | 19,877                  | 345                   | 250             |     | 30                    |
|                         | 19                 | PCBs   | A                | PCB153                      | 20,024                  | 360                   | 290             |     | 30                    |
| 8 (20.31-<br>21.60min)  | 20                 | OCPs   | B                | Endosulfan Sulfate          | 20,661                  | 272                   | 387             |     | 50                    |
|                         | 21                 | OCPs   | B                | 4,4-DDT                     | 20,794                  | 235                   | 165             |     | 50                    |
|                         | 22                 | PCBs   | A                | PCB138                      | 20,946                  | 360                   | 290             |     | 50                    |
| 9 (21.60-<br>24.50min)  | 23                 | PCBs   | A                | PCB180                      | 23,184                  | 396                   | 324             |     | 150                   |
| 10 (24.50-<br>28.90min) | 24                 | PCBs   | A                | PCB194                      | 25,751                  | 430                   | 358             |     | 60                    |
|                         | 25                 | PAHs   | C                | Benzo(b)fluoranthene        | 26,181                  | 252                   | 248             | 250 | 60                    |
|                         | 26                 | PAHs   | C                | Benzo(a)pyrene              | 27,04                   | 252                   | 248             | 250 | 60                    |
| 11 (28.90-<br>32.00min) | 27                 | PAHs   | C                | Indene(1,2,3-cd)-<br>pyrene | 29,997                  | 276                   | 275             | 274 | 100                   |
